# Supplementary material
Source: PubMed Central journal article supplement (PMC8242605)
Supplement: INR-68-461-s005.pdf [file INR-68-461-s005.pdf]

A word cloud shaped like a heart, featuring various terms related to the COVID-19 pandemic and healthcare workers. The words are arranged in a dense, overlapping manner, with some words being significantly larger than others. The colors of the words vary, including shades of green, blue, yellow, orange, red, and purple. The words are oriented in different directions, some horizontal and some vertical, creating a dynamic and expressive visual. The overall shape of the word cloud is a heart, symbolizing love, care, and the emotional impact of the pandemic.

patients  
material  
have  
covid  
job  
days  
situation  
partners  
workers  
pandemic  
lack  
fear  
believe  
hospital  
team  
stress  
without  
room  
anxiety  
best  
do  
experience  
labor  
part  
weeks  
shift  
work  
sensation  
home  
protection  
protocols  
unsafety  
PPE  
low  
level  
general  
nurse  
perform  
people  
many  
never  
sleep  
know  
proud  
night  
great  
effort  
beginning  
alone  
be  
contagion  
first  
now  
training  
time  
see  
moment  
forever  
ICU  
service  
professionals  
thanks  
level  
general  
nurse  
perform  
people  
many  
never  
sleep  
know  
proud  
night  
great  
effort  
beginning  
alone  
be  
contagion  
first  
now  
training  
time  
see  
moment  
forever  
ICU  
service  
professionals  
thanks
