# Supplementary material
Source: PubMed Central journal article supplement (PMC8242605)

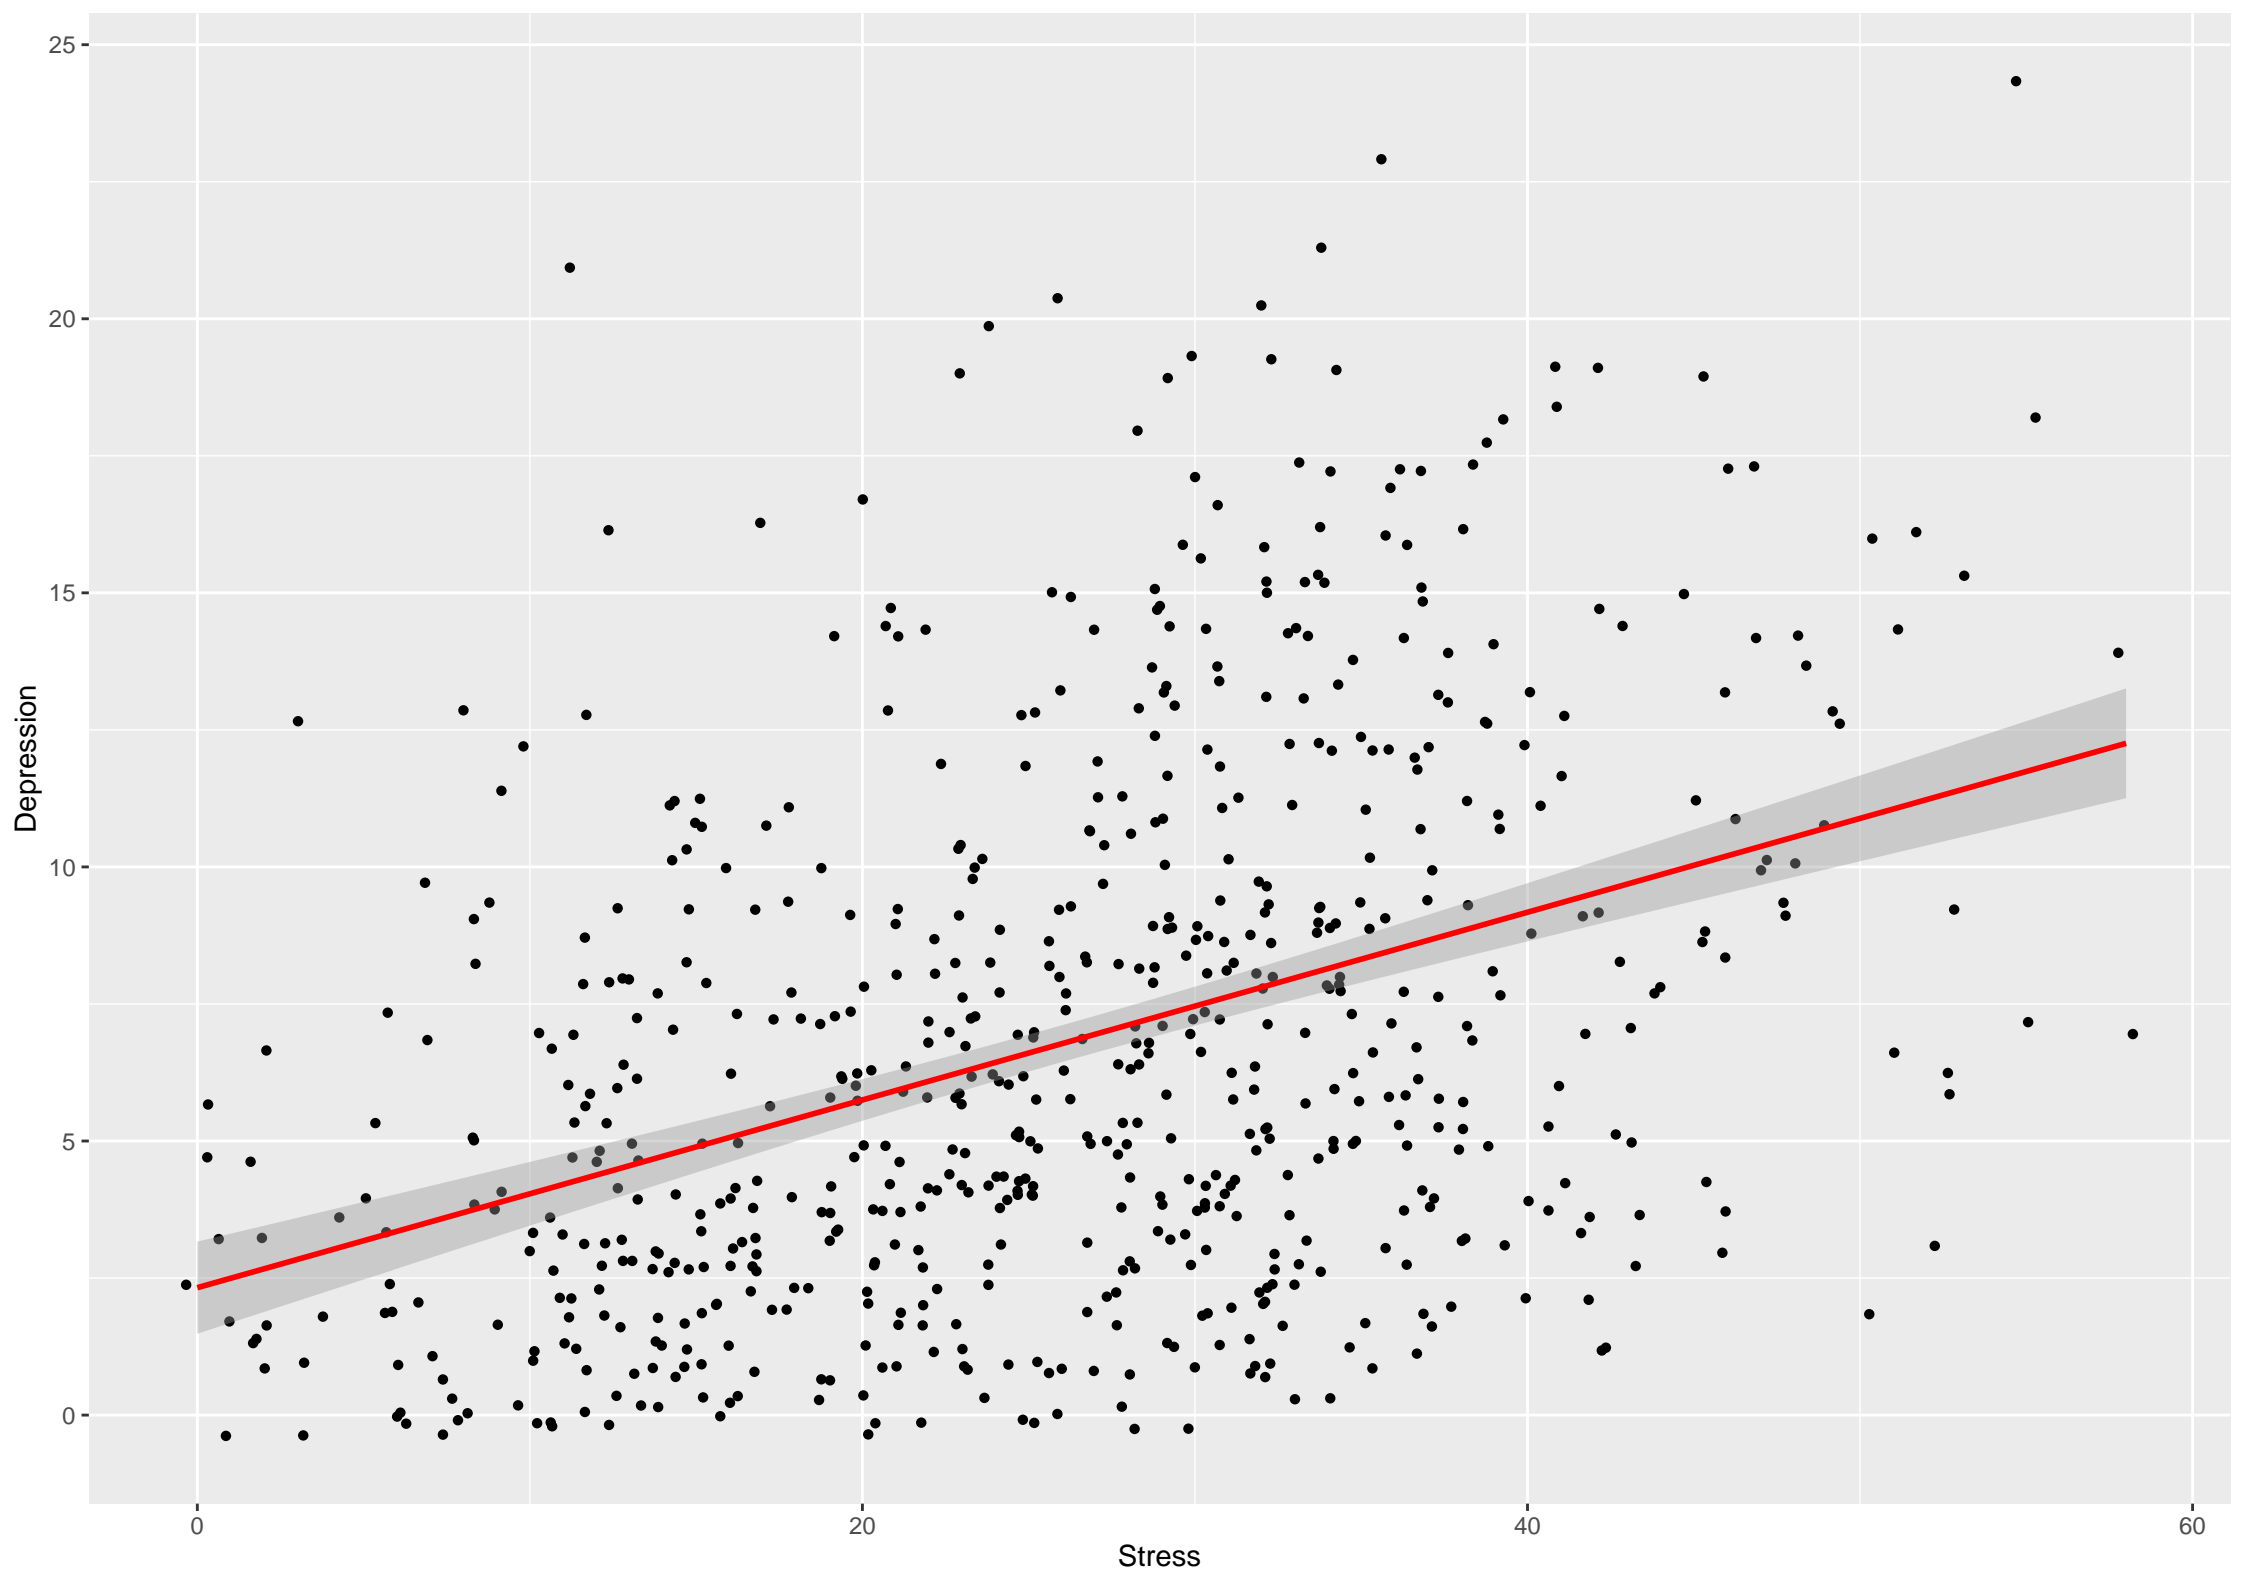

Supplement: INR-68-461-s006.pdf [file INR-68-461-s006.pdf]
